# Supplementary material for: The Microcephalin Ancestral Allele in a Neanderthal Individual
Source: PubMed Central journal article supplement (PMC2871044; doi:10.1371/journal.pone.0010648), 2010-05-14
Supplement: pone.0010648.s001.pdf [file pone.0010648.s001.pdf]

LCT promoter (NCM6)

```
ref_id_008958      CTGCGCTGGCAATACAGATA.....CTCTCCTTAGGTTGCATTTG
PCR1.CL01         CTGCGCTGGCAATACAGATA.....CTCTCCTTAGGTTGCATTTG
PCR1.CL02         13910_F.....13910R
PCR1.CL03         .....
PCR1.CL04         .....
PCR1.CL05         .....
PCR1.CL06         .....
PCR1.CL07         .....
PCR1.CL08         .....
PCR1.CL09         .....
PCR1.CL10         .....
PCR1.CL11         .....
PCR1.CL12         .....
PCR1.CL13         .....
PCR1.CL14         .....
PCR1.CL15         .....
PCR1.CL16         .....
PCR1.CL17         .....
PCR1.CL18         .....
PCR1.CL19         .....A.....
PCR1.CL20         .....
PCR1.CL21         .....
PCR1.CL22         .....
PCR1.CL23         .....
PCR1.CL24         .....
PCR1.CL25         .....
PCR1.CL26         .....
PCR1.CL27         .....TT.....
PCR1.CL28         .....
PCR1.CL29         .....
PCR1.CL30         .....

PCR2.CL01         CTGCGCTGGCAATACAGATA.....CTCTCCTTAGGTTGCATTTG
PCR2.CL02         13910_F.....13910R
PCR2.CL03         .....
PCR2.CL04         .....
PCR2.CL05         .....
PCR2.CL06         .....
PCR2.CL07         .....
PCR2.CL08         .....
PCR2.CL09         .....
PCR2.CL10         .....
PCR2.CL11         .....
PCR2.CL12         .....
PCR2.CL13         .....
PCR2.CL14         .....
PCR2.CL15         .....
PCR2.CL16         .....
PCR2.CL17         .....
PCR2.CL18         .....
PCR2.CL19         .....
PCR2.CL20         .....
PCR2.CL21         .....
PCR2.CL22         .....
PCR2.CL23         .....
PCR2.CL24         .....
PCR2.CL25         .....
PCR2.CL26         .....
PCR2.CL27         .....
PCR2.CL28         .....
PCR2.CL29         .....
PCR2.CL30         .....
```
